# Supplementary material for: Effect of the spacer of gemini surfactants on reverse micellar extraction of bovine serum albumin
Source: Royal Society of Chemistry journal article supplement (doi:10.1039/c3sm52183d), 2013-01-01
Supplement: c3sm52183d.pdf [file c3sm52183d.pdf]

## Supporting Information

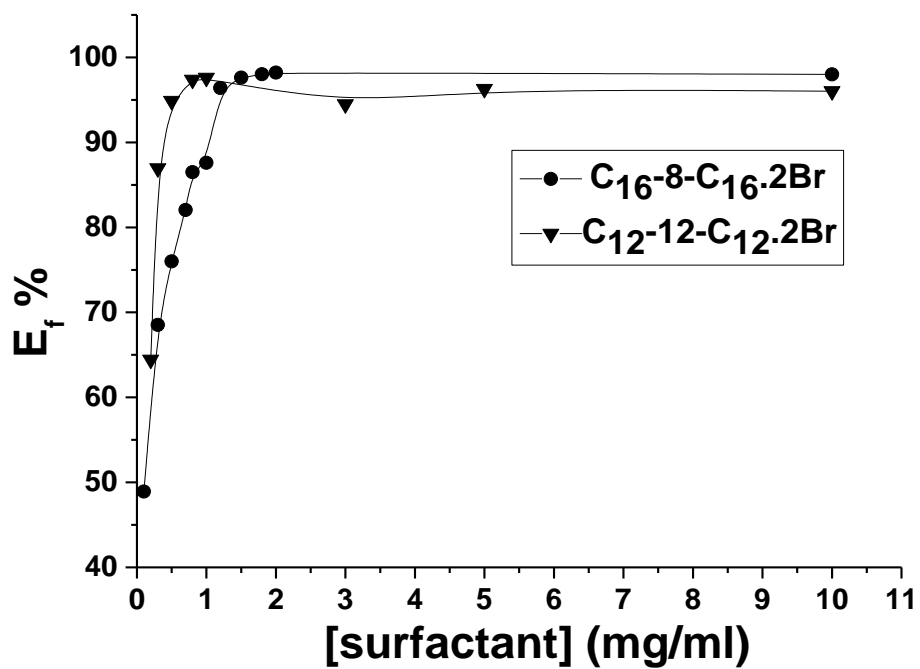

Fig. S1 Dependences of the forward extraction efficiency  $E_f$  of BSA on surfactant content in the absence of salt. pH: 7.0.

## Supporting Information

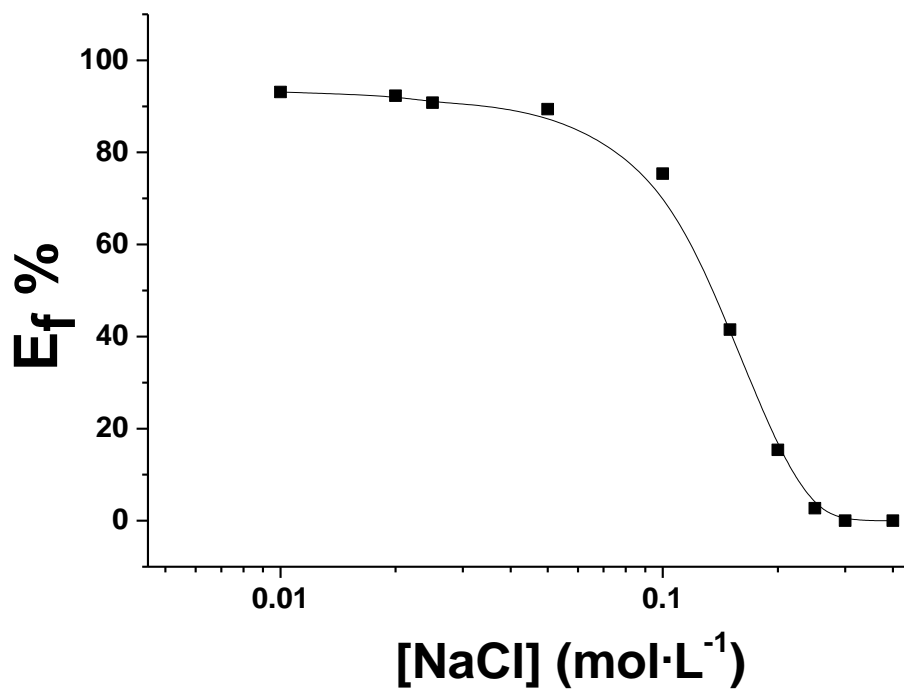

Fig. S2 Dependences of the forward extraction efficiency  $E_f$  of BSA with  $\text{C}_{12}\text{-2-C}_{12}\text{:2Br}$  reverse micelle on NaCl content. pH: 8.0. Surfactant concentration: 20 mg/ml.

## Supporting Information

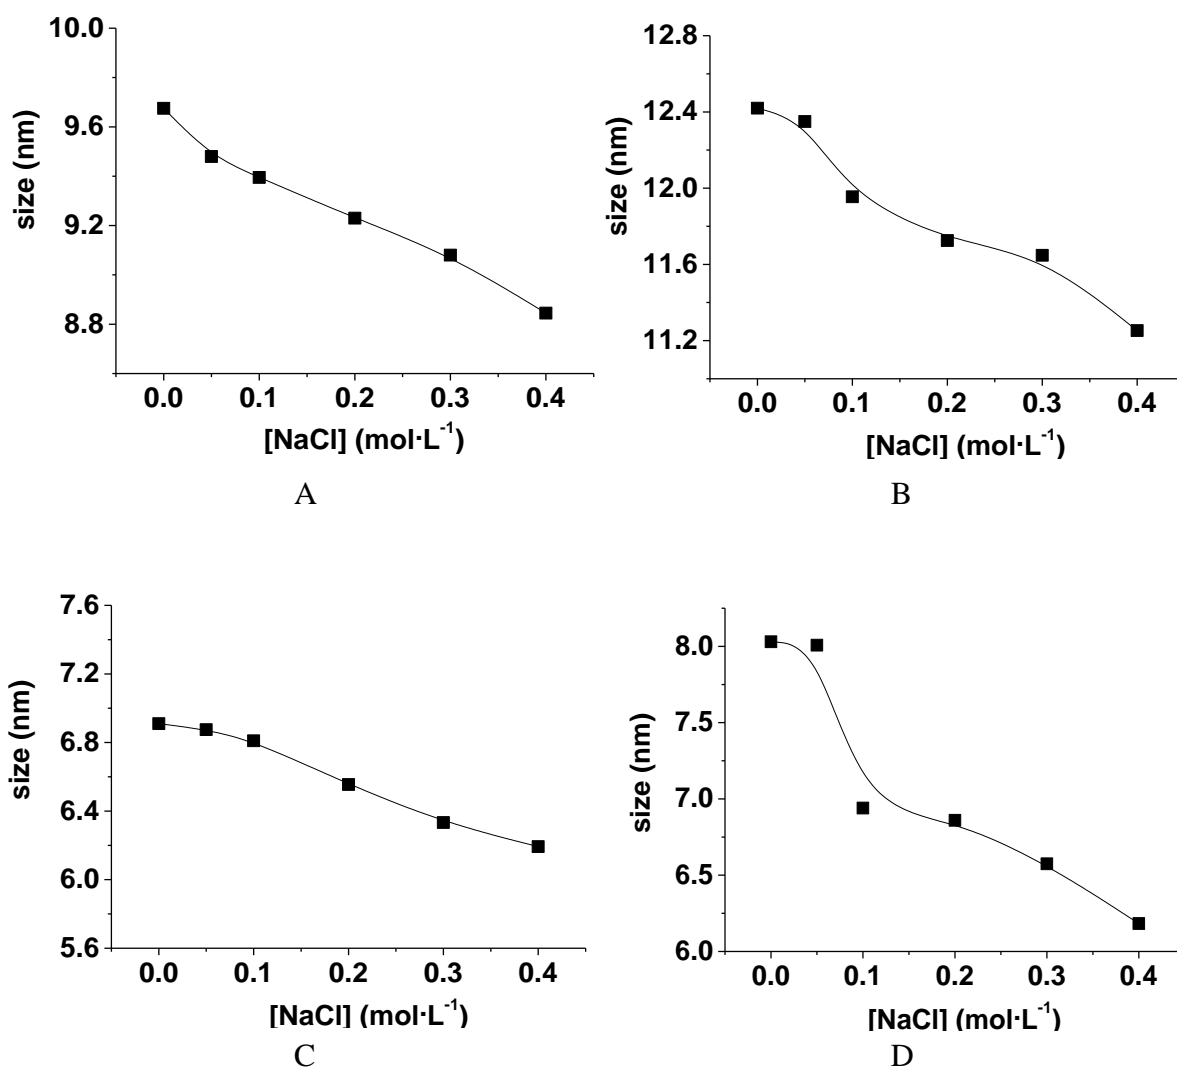

Fig. S3 Sizes for C<sub>12</sub>-5-C<sub>12</sub>·2Br (A), C<sub>12</sub>-12-C<sub>12</sub>·2Br (B), C<sub>16</sub>-5-C<sub>16</sub>·2Br (C) and C<sub>16</sub>-8-C<sub>16</sub>·2Br (D) reverse micelles.

## Supporting Information

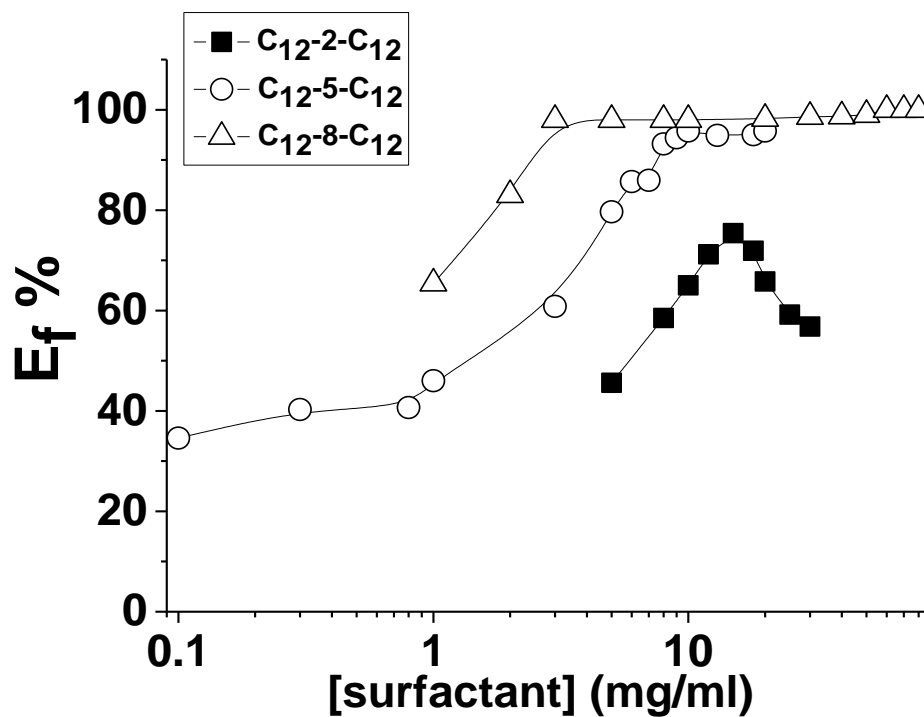

Fig. S4 Relationship between the forward extraction efficiency  $E_f$  and surfactant content in the presence of NaCl ( $0.1 \text{ mol}\cdot\text{L}^{-1}$ ). pH: 8.0 with  $C_{12}\text{-}2\text{-}C_{12}\cdot 2\text{Br}$  reverse micelle and 7.0 with the other reverse micelles.

## Supporting Information

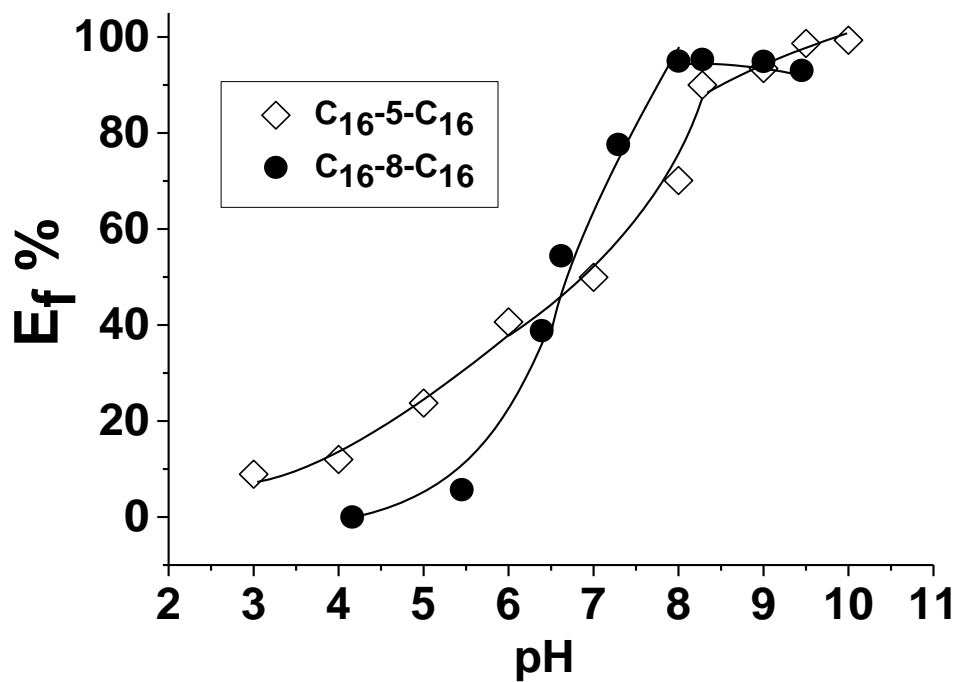

Fig. S5 Relationship between the forward extraction efficiency  $E_f$  of BSA and pH of the aqueous phase (with  $0.1 \text{ mol}\cdot\text{L}^{-1}$  NaCl). Surfactant concentration: 20 mg/ml.
